# Supplementary material for: TumorBoost: Normalization of allele-specific tumor copy numbers from a single pair of tumor-normal genotyping microarrays
Source: Springer Nature journal article supplement (doi:10.1186/1471-2105-11-245), 2010-05-12
Supplement: 12859_2009_3702_MOESM8_ESM.PDF [file 12859_2009_3702_MOESM8_ESM.PDF]

Supplementary Note: Assessment of TumorBoost based on  
tumor/normal pair TCGA-23-1027 in the Illumina  
Human1M-Duo data set TCGA,OV,BeadStudio,BAF using the  
SNPs with 90% highest confidence scores

Henrik Bengtsson, Pierre Neuvial, Terence P. Speed

March 9, 2010

## Contents

|          |                                                                        |           |
|----------|------------------------------------------------------------------------|-----------|
| <b>1</b> | <b>Introduction</b>                                                    | <b>3</b>  |
| <b>2</b> | <b>Data set</b>                                                        | <b>3</b>  |
| 2.1      | Preprocessing methods . . . . .                                        | 3         |
| 2.2      | Stratification on genotype confidence scores . . . . .                 | 3         |
| 2.3      | List of change points . . . . .                                        | 3         |
| <b>3</b> | <b>Region: TCGA-23-1027:Chr2@108-140,cp=124+/-0.5,s=0/1</b>            | <b>4</b>  |
| 3.1      | Decrease in Heterozygosity (DH) and total copy-number tracks . . . . . | 4         |
| 3.2      | Allele B fraction density plots . . . . .                              | 5         |
| 3.3      | ROC curves . . . . .                                                   | 5         |
| 3.4      | $(\beta_N, \beta_T)$ plots . . . . .                                   | 6         |
| 3.5      | Allele-specific copy number estimates . . . . .                        | 7         |
| <b>4</b> | <b>Region: TCGA-23-1027:Chr2@125.0-157.0,cp=141.0+/-0.5,s=1/3</b>      | <b>8</b>  |
| 4.1      | Decrease in Heterozygosity (DH) and total copy-number tracks . . . . . | 8         |
| 4.2      | Allele B fraction density plots . . . . .                              | 9         |
| 4.3      | ROC curves . . . . .                                                   | 9         |
| 4.4      | $(\beta_N, \beta_T)$ plots . . . . .                                   | 10        |
| 4.5      | Allele-specific copy number estimates . . . . .                        | 11        |
| <b>5</b> | <b>Region: TCGA-23-1027:Chr10@80-109,cp=94+/-0.5,s=0/2</b>             | <b>12</b> |
| 5.1      | Decrease in Heterozygosity (DH) and total copy-number tracks . . . . . | 12        |
| 5.2      | Allele B fraction density plots . . . . .                              | 13        |
| 5.3      | ROC curves . . . . .                                                   | 13        |
| 5.4      | $(\beta_N, \beta_T)$ plots . . . . .                                   | 14        |
| 5.5      | Allele-specific copy number estimates . . . . .                        | 15        |
| <b>6</b> | <b>Region: TCGA-23-1027:Chr10@106.5-113.5,cp=110+/-0.5,s=2/3</b>       | <b>16</b> |
| 6.1      | Decrease in Heterozygosity (DH) and total copy-number tracks . . . . . | 16        |
| 6.2      | Allele B fraction density plots . . . . .                              | 17        |
| 6.3      | ROC curves . . . . .                                                   | 17        |
| 6.4      | $(\beta_N, \beta_T)$ plots . . . . .                                   | 18        |
| 6.5      | Allele-specific copy number estimates . . . . .                        | 19        |
| <b>7</b> | <b>Region: TCGA-23-1027:Chr2@55-75.0,cp=65.0+/-0.5,s=0/1</b>           | <b>20</b> |
| 7.1      | Decrease in Heterozygosity (DH) and total copy-number tracks . . . . . | 20        |
| 7.2      | Allele B fraction density plots . . . . .                              | 21        |
| 7.3      | ROC curves . . . . .                                                   | 21        |
| 7.4      | $(\beta_N, \beta_T)$ plots . . . . .                                   | 22        |
| 7.5      | Allele-specific copy number estimates . . . . .                        | 23        |

|                                                                 |           |
|-----------------------------------------------------------------|-----------|
| <b>8 Bootstrap estimates of test statistics for all regions</b> | <b>24</b> |
| <b>A Data files</b>                                             | <b>26</b> |
| A.1 Total copy numbers . . . . .                                | 26        |
| A.2 Allele B fractions . . . . .                                | 26        |
| A.3 Genotype calls . . . . .                                    | 26        |
| A.4 Genotype confidence scores . . . . .                        | 26        |
| <b>B Session information</b>                                    | <b>28</b> |

# 1 Introduction

This report, which is automatically generated, assesses the performance of the TumorBoost method based on a few change points in a particular tumor/normal pair. For more details on the evaluation methods, see the main TumorBoost manuscript.

## 2 Data set

The evaluation in this report is based on the tumor/normal pair (01A,10A) for individual TCGA-23-1027 in the data set TCGA,OV,BeadStudio,BAF.

### 2.1 Preprocessing methods

The data was generated on the Illumina Human1M-Duo chip type. Each array was preprocessed using Birdseed’s ”BAF” normalization method Peiffer *et al.* (2006), which is a multi-array (population-based) method.

### 2.2 Stratification on genotype confidence scores

We focus on the SNPs in which we are the most confident that they are heterozygous: the evaluation will involve the 90% SNPs with highest genotype confidence scores.

### 2.3 List of change points

For this data set, we have selected a few regions for which one can safely assume that there exists a single copy number change point. By definition, each change point separates two sets of genomic loci such that the true Decrease in Heterozygosity (DH) is the same within one set of loci but differs between the two sets. These regions were selected visually. For each region we chose a large enough safety margin to make our evaluation independent of the uncertainty on the true location of the change point.

| Chr | Region      | Change point | Margin | Before           | After                    |
|-----|-------------|--------------|--------|------------------|--------------------------|
| 2   | 108-140     | 124          | 0.5    | 'normal' (1,1)   | 'gain' (1,2)             |
| 2   | 125-157     | 141          | 0.5    | 'gain' (1,2)     | 'copy neutral LOH' (0,2) |
| 10  | 80-109      | 94           | 0.5    | 'normal' (1,1)   | 'deletion' (0,1)         |
| 10  | 106.5-113.5 | 110          | 0.5    | 'deletion' (0,1) | 'copy neutral LOH' (0,2) |
| 2   | 55-75       | 65           | 0.5    | 'normal' (1,1)   | 'gain' (1,2)             |

Table 1: Regions in TCGA-23-1027 used for the evaluation and that each contain a single changepoint. All positions and lengths are in units of Mb.

We next compare how well each of these change points is detected using the above preprocessed signals followed or not by TumorBoost normalization using the ROC analysis described in the main TumorBoost manuscript at the full resolution as well as smoothed resolution with bin sizes  $h = \{1, 2, 4\}$ . Specifically, we compare the following three methods: (1) “**raw**”: preprocessed signals without TumorBoost normalization. (2) “**TBN,NGC**”: preprocessed signals followed by TumorBoost normalization using NGC genotype calls. For completeness we also include an evaluation of Total copy numbers (TCN).

### 3 Region: TCGA-23-1027:Chr2@108-140,cp=124+/-0.5,s=0/1

#### 3.1 Decrease in Heterozygosity (DH) and total copy-number tracks

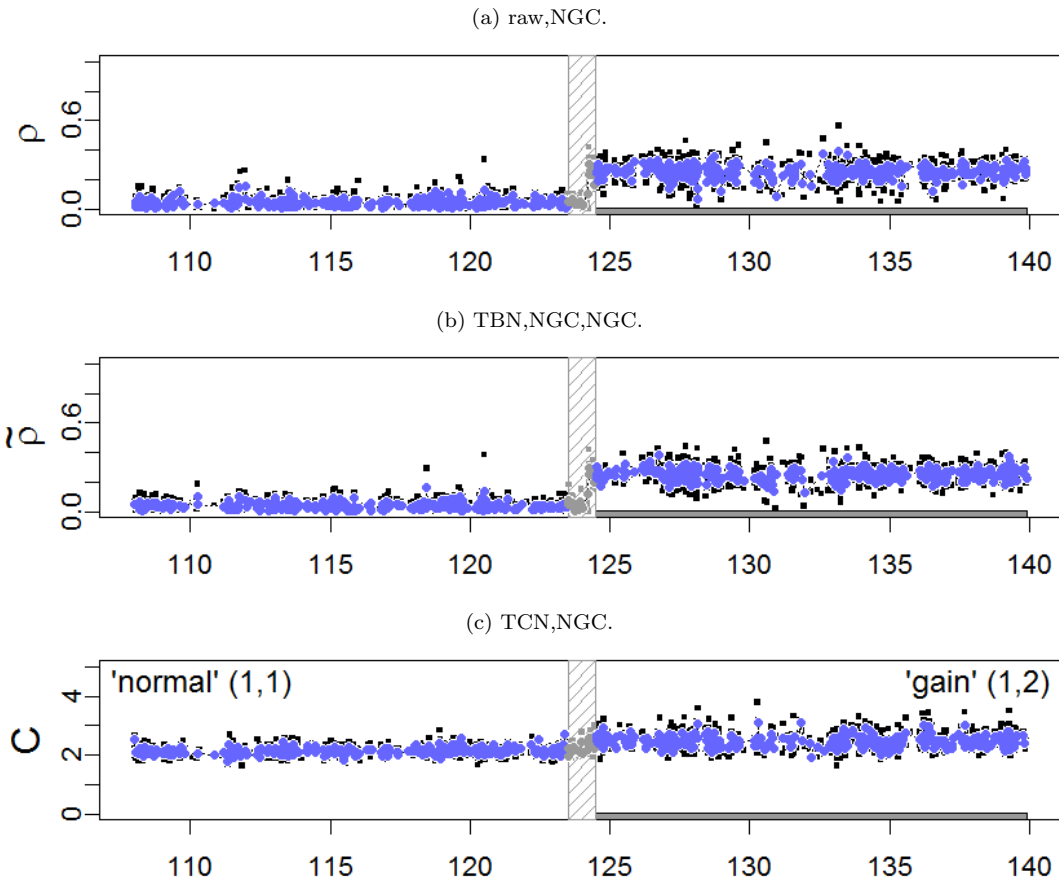

Figure 1: Decrease in Heterozygosity (DH) and total copy numbers for region TCGA-23-1027:Chr2@108-140,cp=124+/-0.5,s=0/1. Only heterozygous SNPs are plotted. There are 1444 loci of state 'normal' (1,1) ("negatives") and 1444 loci of state 'gain' (1,2) ("positives"), where the latter are highlighted with a solid bar beneath. In total 80 loci within the safety margin were excluded.

### 3.2 Allele B fraction density plots

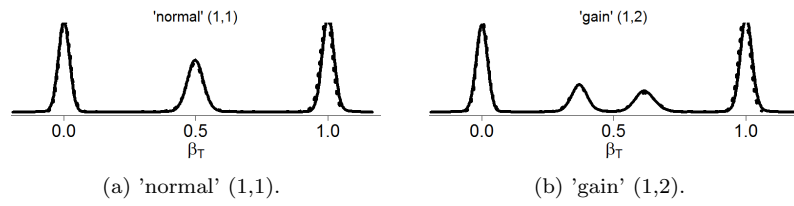

Figure 2: Density of raw (dashed lines) and TumorBoost-normalized (solid lines) allele B fractions for region TCGA-23-1027:Chr2@108-140,cp=124+/-0.5,s=0/1.

### 3.3 ROC curves

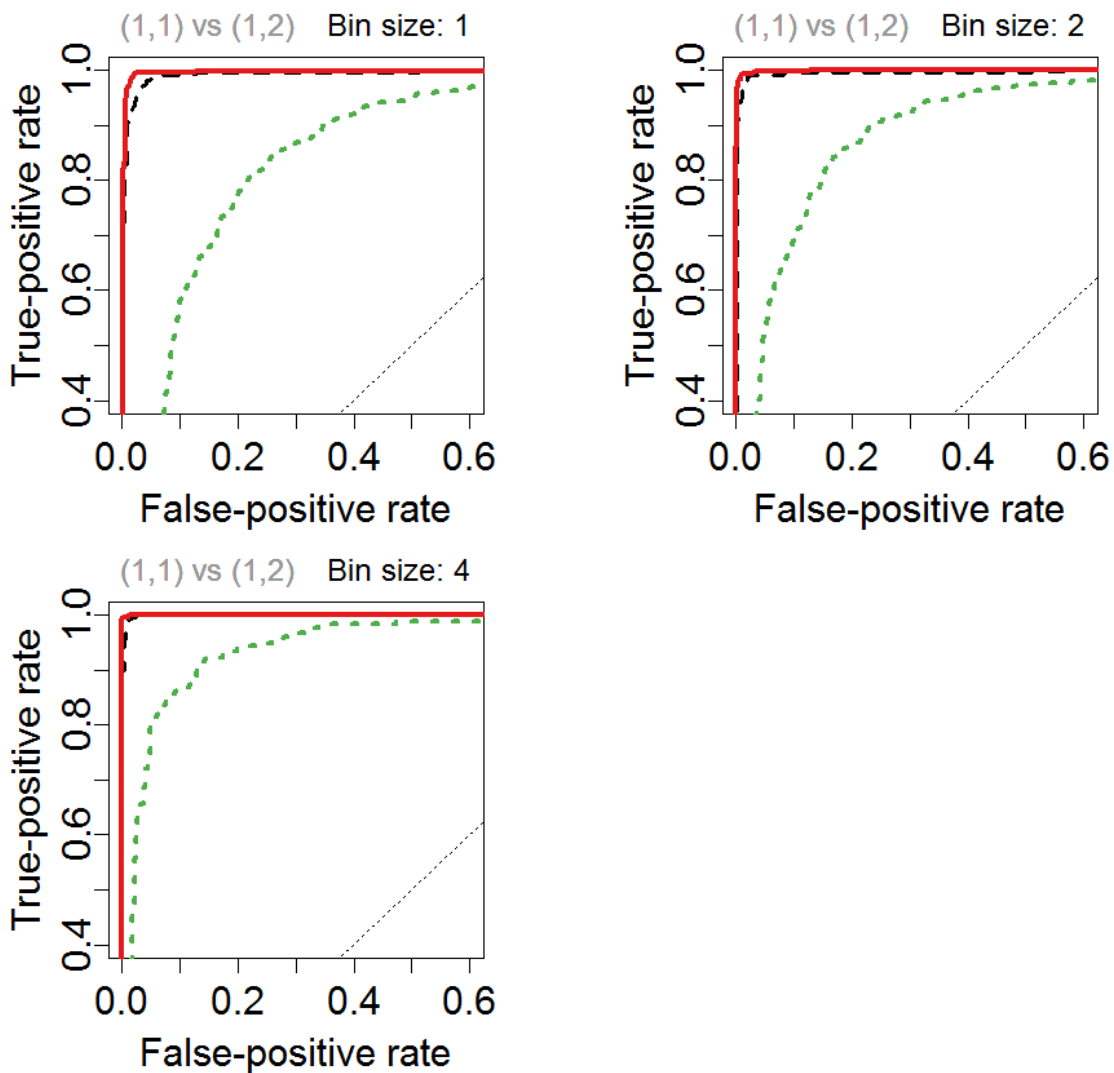

Figure 3: ROC curves for each preprocessing method at the full resolution as well as 2 different amounts of smoothing (using the mean() function) for region TCGA-23-1027:Chr2@108-140,cp=124+/-0.5,s=0/1. Legend: raw,NGC (dashed; #000000), TBN,NGC,NGC (solid; #E41A1C) and TCN,NGC (dotted; #4DAF4A).

### 3.4 $(\beta_N, \beta_T)$ plots

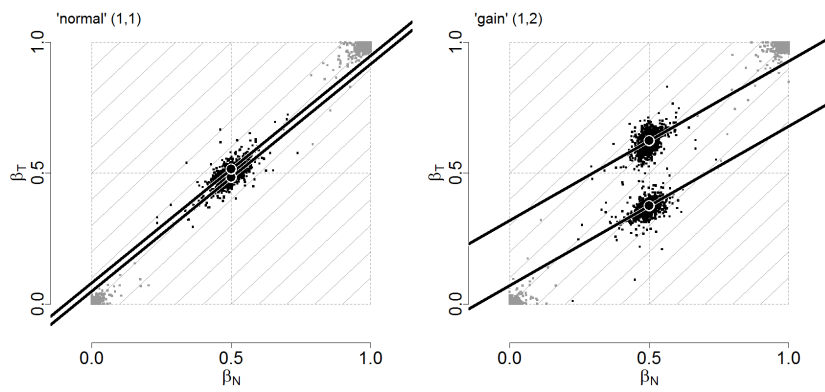

Figure 4: raw,NGC for region TCGA-23-1027:Chr2@108-140,cp=124+/-0.5,s=0/1.

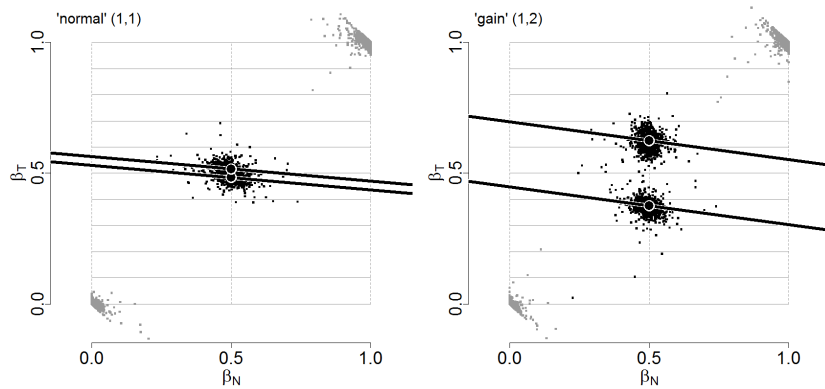

Figure 5: TBN,NGC,NGC for region TCGA-23-1027:Chr2@108-140,cp=124+/-0.5,s=0/1.

### 3.5 Allele-specific copy number estimates

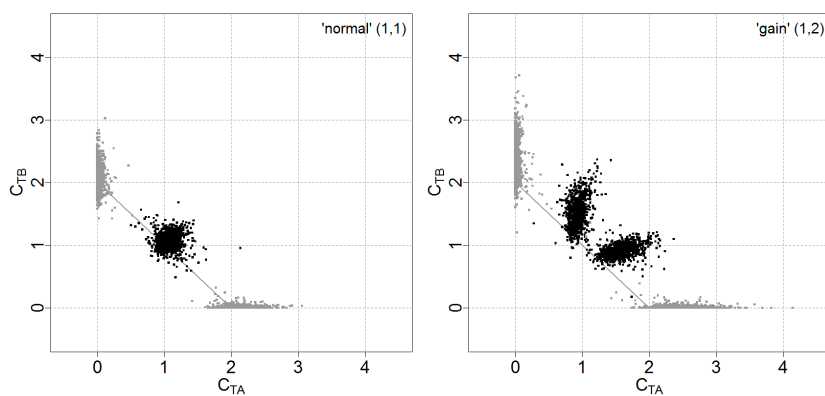

Figure 6: raw,NGC for region TCGA-23-1027:Chr2@108-140, cp=124+/-0.5, s=0/1.

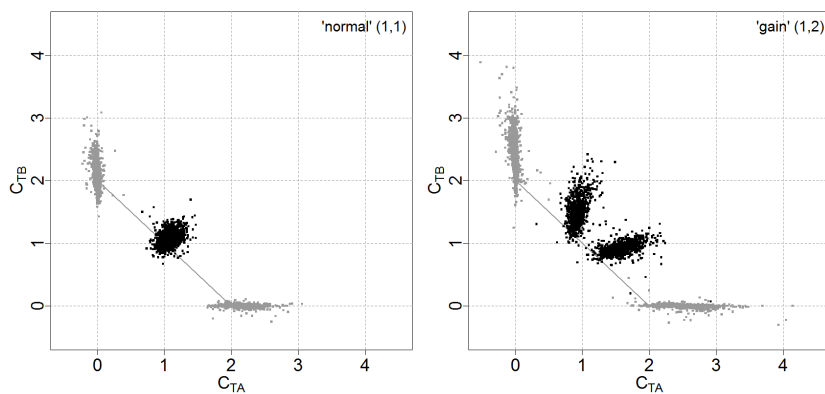

Figure 7: TBN,NGC,NGC for region TCGA-23-1027:Chr2@108-140, cp=124+/-0.5, s=0/1.

## 4 Region: TCGA-23-1027:Chr2@125.0-157.0,cp=141.0+/-0.5,s=1/3

### 4.1 Decrease in Heterozygosity (DH) and total copy-number tracks

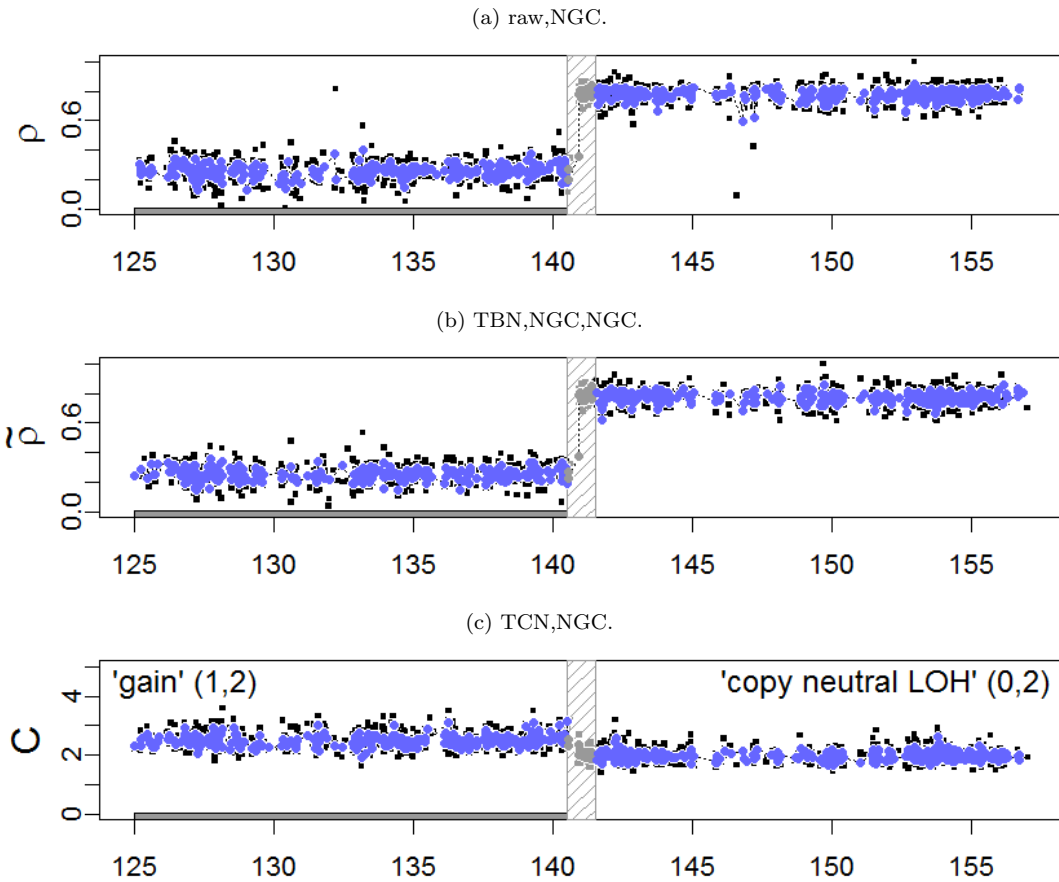

Figure 8: Decrease in Heterozygosity (DH) and total copy numbers for region TCGA-23-1027:Chr2@125.0-157.0,cp=141.0+/-0.5,s=1/3. Only heterozygous SNPs are plotted. There are 1145 loci of state 'gain' (1,2) ("negatives") and 1145 loci of state 'copy neutral LOH' (0,2) ("positives"), where the latter are highlighted with a solid bar beneath. In total 68 loci within the safety margin were excluded.



## 4.2 Allele B fraction density plots

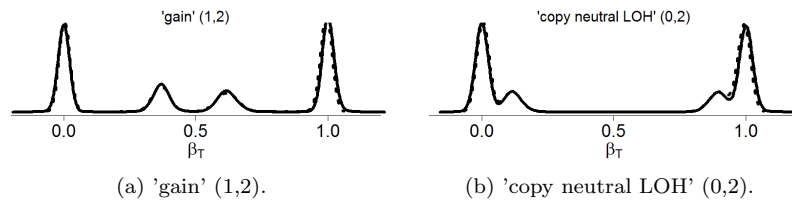

Figure 9: Density of raw (dashed lines) and TumorBoost-normalized (solid lines) allele B fractions for region TCGA-23-1027:Chr2@125.0-157.0,cp=141.0+/-0.5,s=1/3.

## 4.3 ROC curves

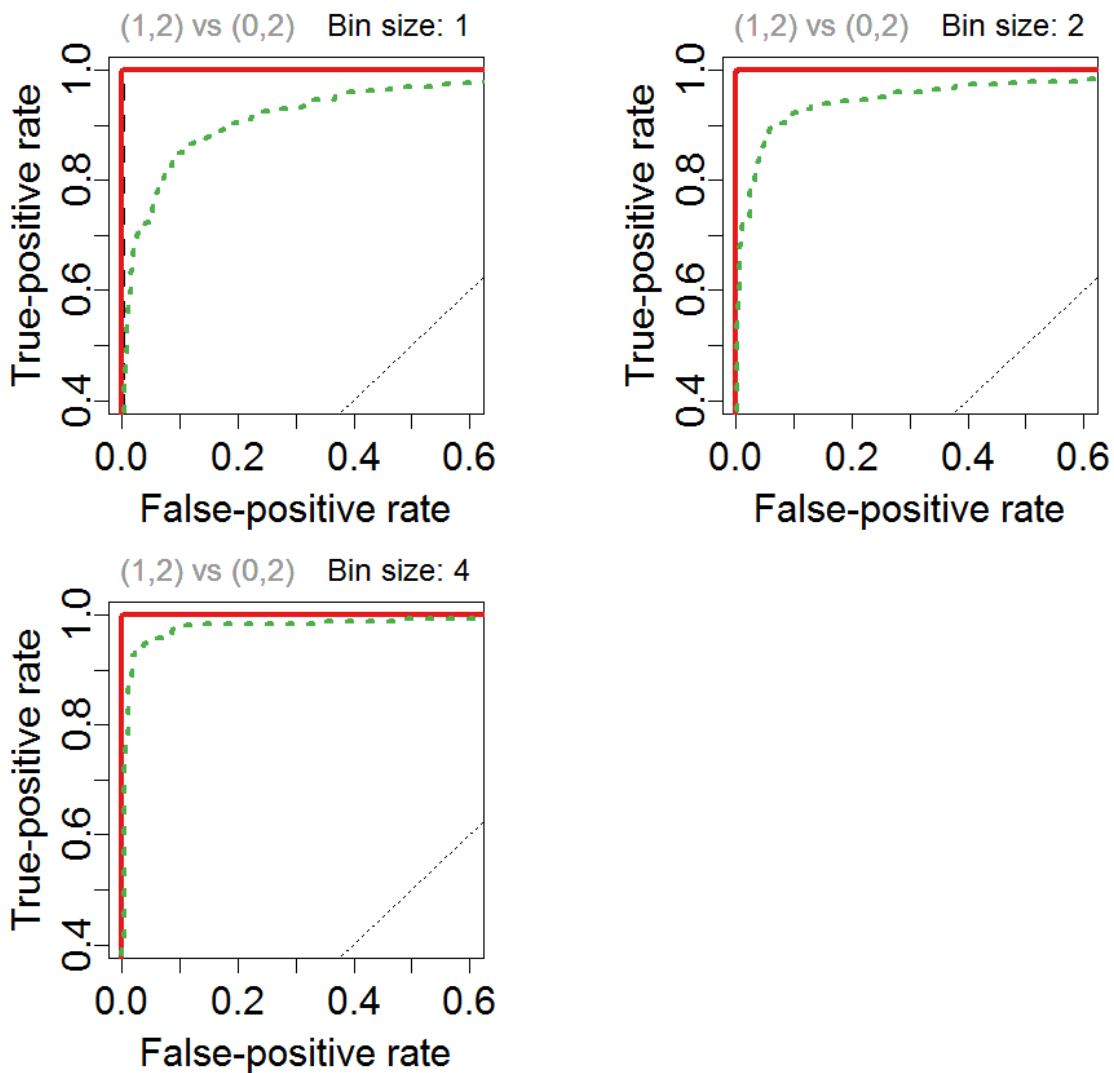

Figure 10: ROC curves for each preprocessing method at the full resolution as well as 2 different amounts of smoothing (using the `mean()` function) for region TCGA-23-1027:Chr2@125.0-157.0,cp=141.0+/-0.5,s=1/3. Legend: raw,NGC (dashed; #000000), TBN,NGC,NGC (solid; #E41A1C) and TCN,NGC (dotted; #4DAF4A).

#### 4.4 $(\beta_N, \beta_T)$ plots

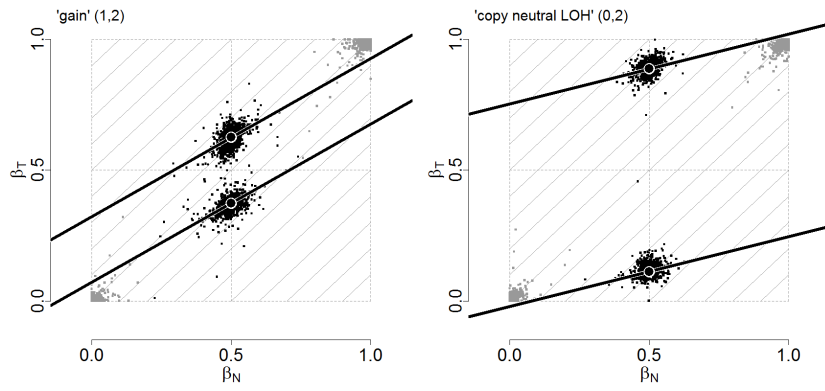

Figure 11: raw,NGC for region TCGA-23-1027:Chr2@125.0-157.0,cp=141.0+/-0.5,s=1/3.

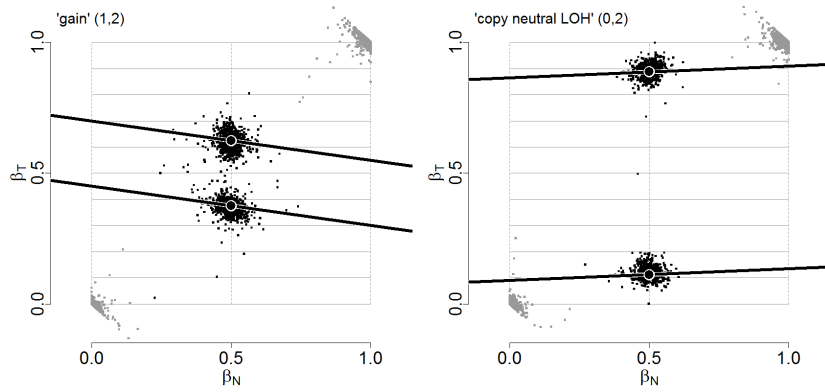

Figure 12: TBN,NGC,NGC for region TCGA-23-1027:Chr2@125.0-157.0,cp=141.0+/-0.5,s=1/3.

## 4.5 Allele-specific copy number estimates

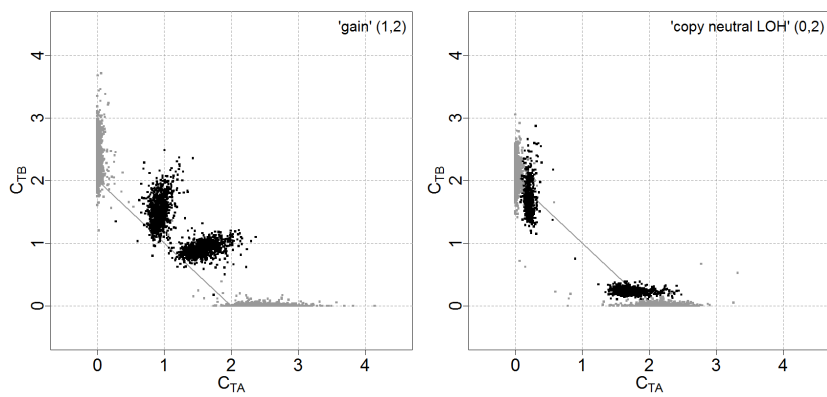

Figure 13: raw,NGC for region TCGA-23-1027:Chr2@125.0-157.0,cp=141.0+/-0.5,s=1/3.

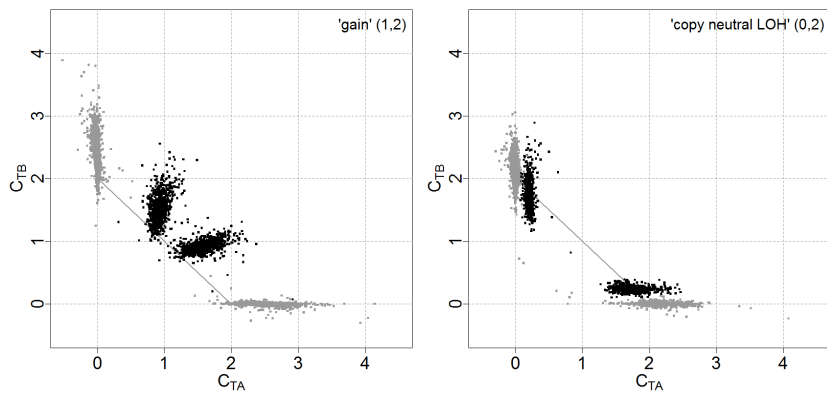

Figure 14: TBN,NGC,NGC for region TCGA-23-1027:Chr2@125.0-157.0,cp=141.0+/-0.5,s=1/3.

## 5 Region: TCGA-23-1027:Chr10@80-109,cp=94+/-0.5,s=0/2

### 5.1 Decrease in Heterozygosity (DH) and total copy-number tracks

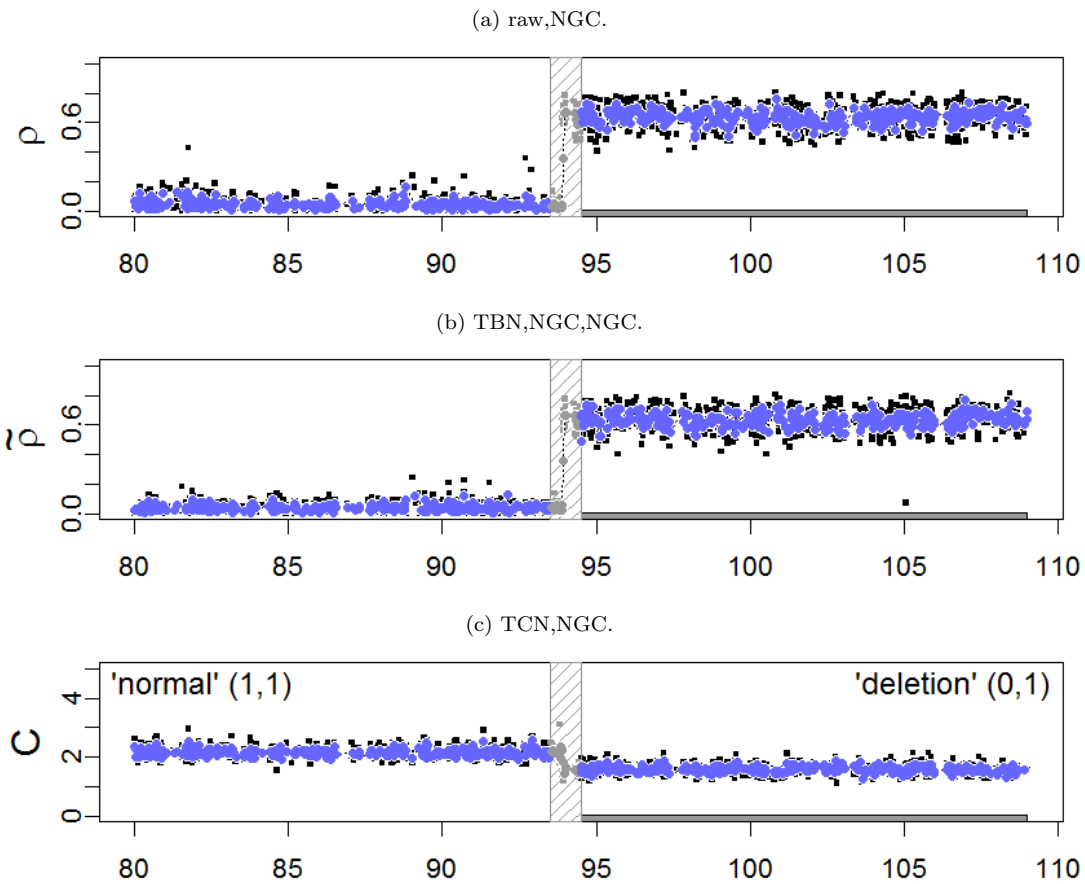

Figure 15: Decrease in Heterozygosity (DH) and total copy numbers for region TCGA-23-1027:Chr10@80-109,cp=94+/-0.5,s=0/2. Only heterozygous SNPs are plotted. There are 1374 loci of state 'normal' (1,1) ("negatives") and 1374 loci of state 'deletion' (0,1) ("positives"), where the latter are highlighted with a solid bar beneath. In total 91 loci within the safety margin were excluded.

## 5.2 Allele B fraction density plots

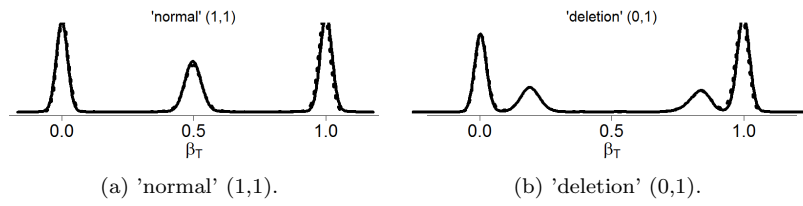

Figure 16: Density of raw (dashed lines) and TumorBoost-normalized (solid lines) allele B fractions for region TCGA-23-1027:Chr10@80-109, cp=94+/-0.5, s=0/2.

## 5.3 ROC curves

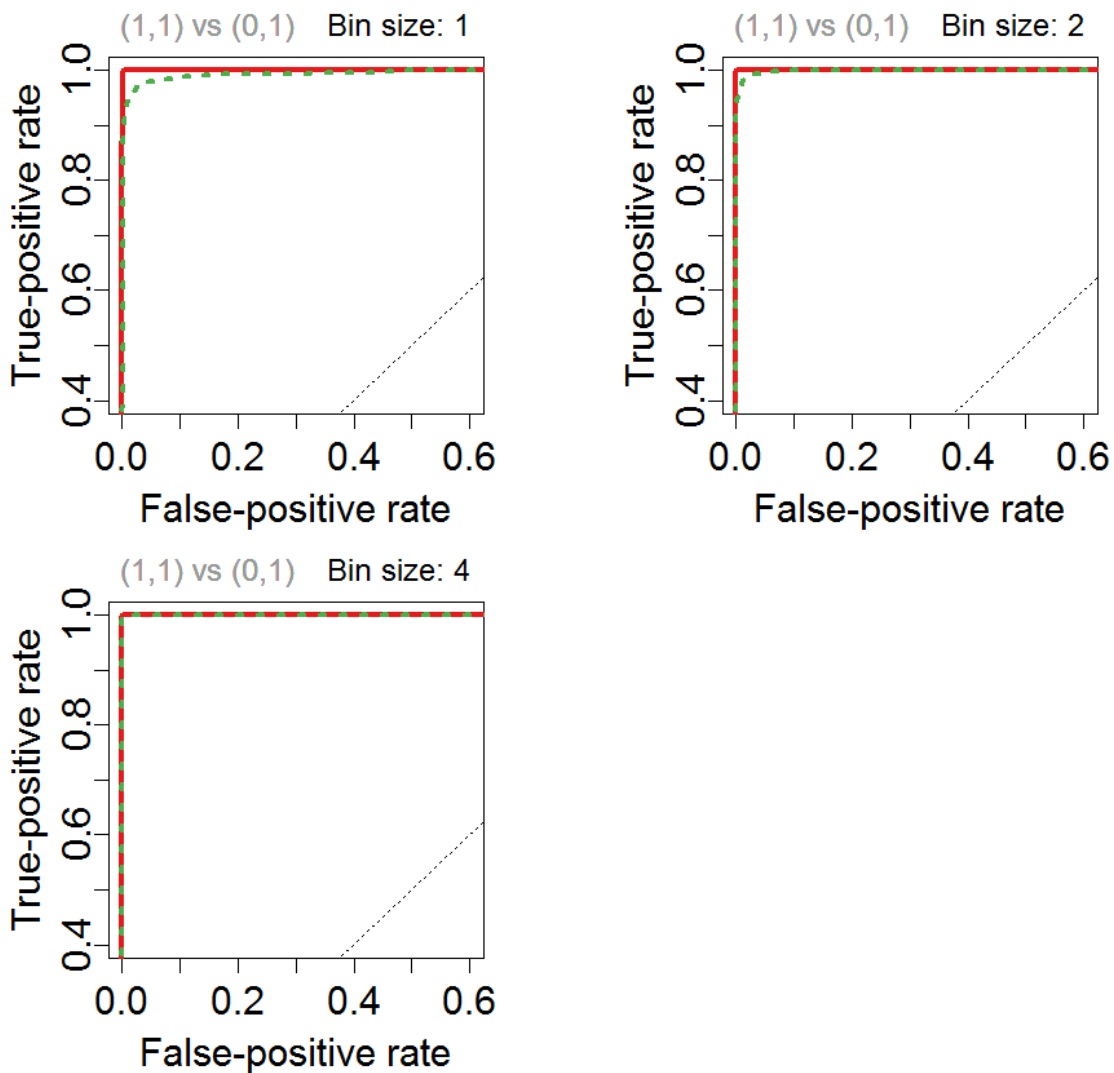

Figure 17: ROC curves for each preprocessing method at the full resolution as well as 2 different amounts of smoothing (using the mean() function) for region TCGA-23-1027:Chr10@80-109, cp=94+/-0.5, s=0/2. Legend: raw,NGC (dashed; #000000), TBN,NGC,NGC (solid; #E41A1C) and TCN,NGC (dotted; #4DAF4A).

## 5.4 $(\beta_N, \beta_T)$ plots

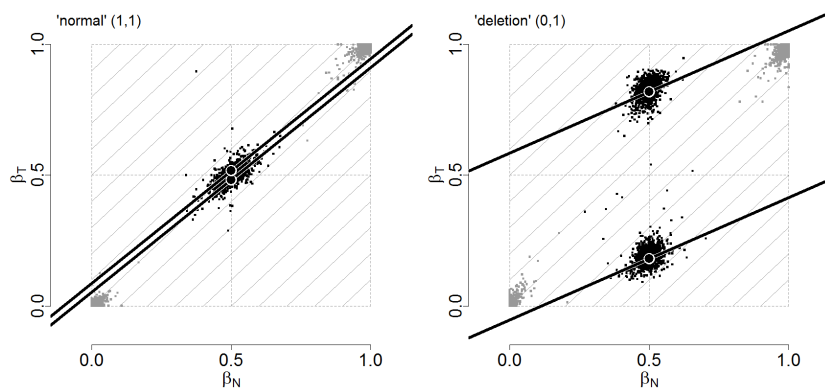

Figure 18: raw,NGC for region TCGA-23-1027:Chr10@80-109,cp=94+/-0.5,s=0/2.

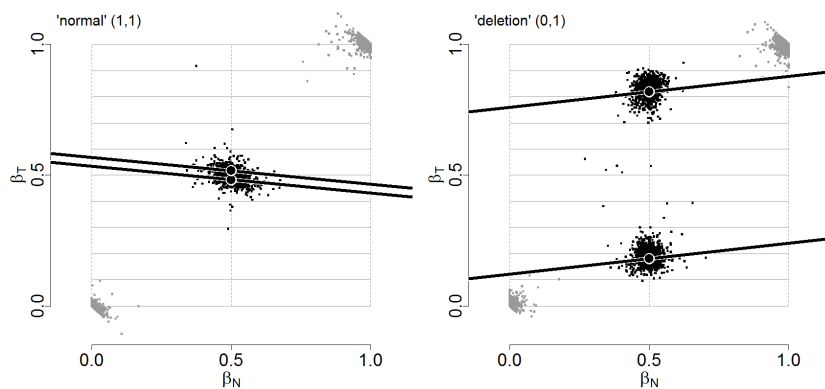

Figure 19: TBN,NGC,NGC for region TCGA-23-1027:Chr10@80-109,cp=94+/-0.5,s=0/2.

## 5.5 Allele-specific copy number estimates

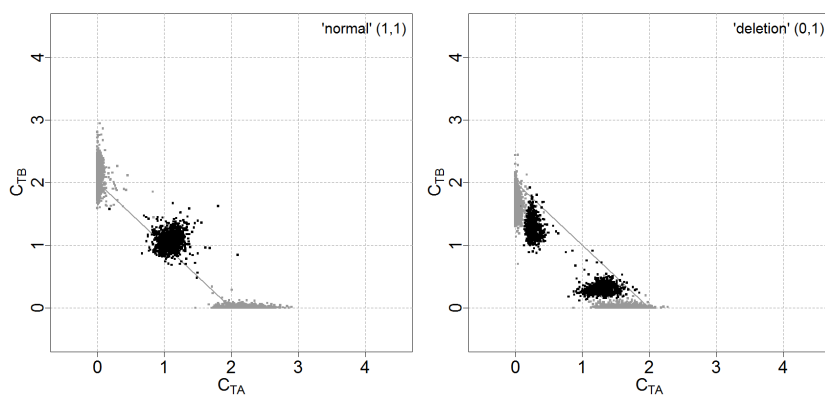

Figure 20: raw,NGC for region TCGA-23-1027:Chr10@80-109,cp=94+/-0.5,s=0/2.

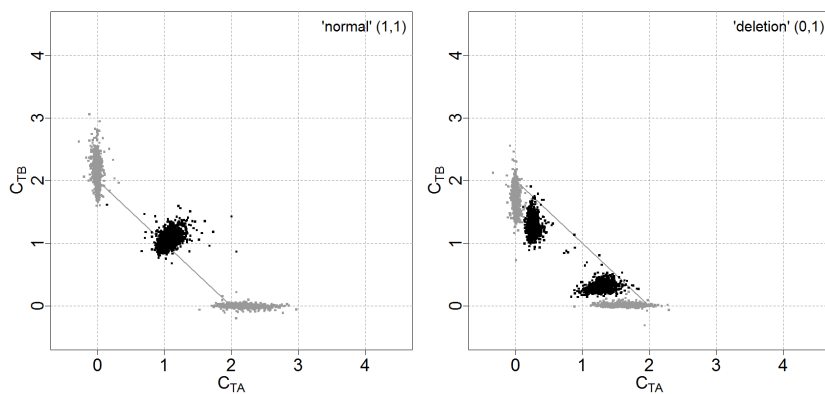

Figure 21: TBN,NGC,NGC for region TCGA-23-1027:Chr10@80-109,cp=94+/-0.5,s=0/2.

## 6 Region: TCGA-23-1027:Chr10@106.5-113.5,cp=110+/-0.5,s=2/3

### 6.1 Decrease in Heterozygosity (DH) and total copy-number tracks

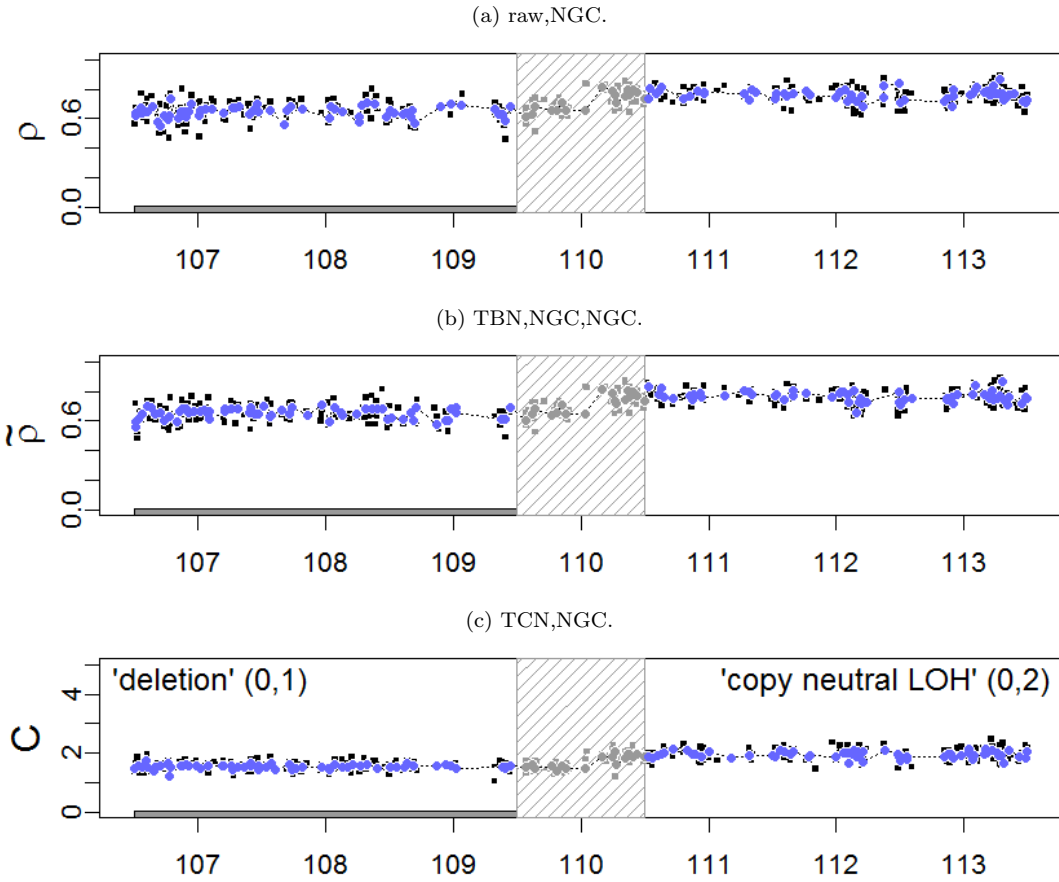

Figure 22: Decrease in Heterozygosity (DH) and total copy numbers for region TCGA-23-1027:Chr10@106.5-113.5,cp=110+/-0.5,s=2/3. Only heterozygous SNPs are plotted. There are 241 loci of state 'deletion' (0,1) ("negatives") and 241 loci of state 'copy neutral LOH' (0,2) ("positives"), where the latter are highlighted with a solid bar beneath. In total 72 loci within the safety margin were excluded.



## 6.2 Allele B fraction density plots

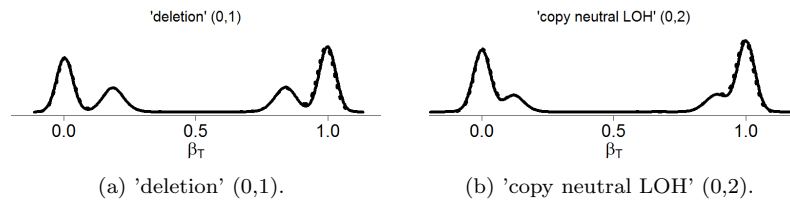

Figure 23: Density of raw (dashed lines) and TumorBoost-normalized (solid lines) allele B fractions for region TCGA-23-1027:Chr10@106.5-113.5, cp=110 $\pm$ 0.5, s=2/3.

## 6.3 ROC curves

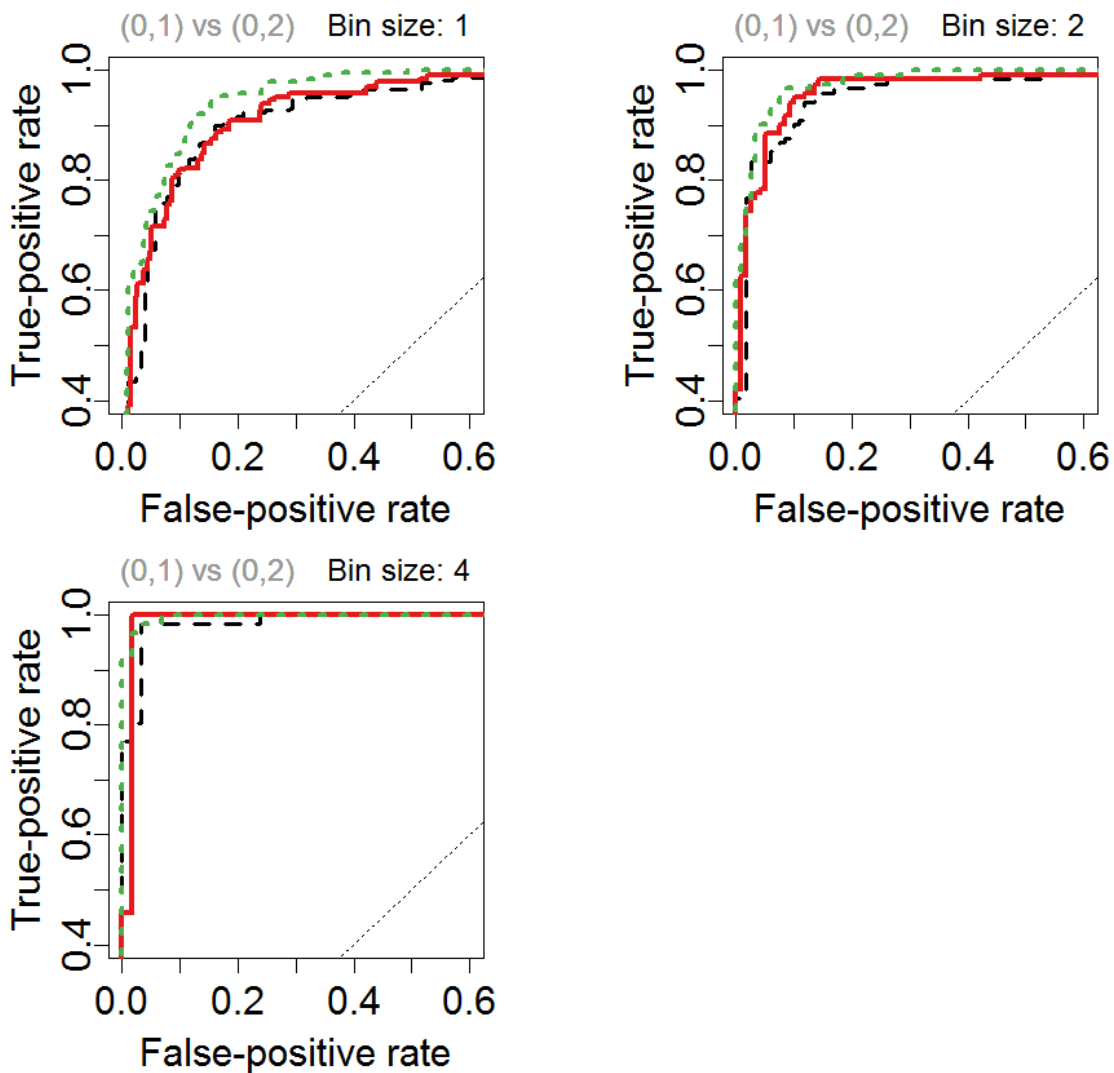

Figure 24: ROC curves for each preprocessing method at the full resolution as well as 2 different amounts of smoothing (using the mean() function) for region TCGA-23-1027:Chr10@106.5-113.5, cp=110 $\pm$ 0.5, s=2/3. Legend: raw,NGC (dashed; #000000), TBN,NGC,NGC (solid; #E41A1C) and TCN,NGC (dotted; #4DAF4A).

## 6.4 $(\beta_N, \beta_T)$ plots

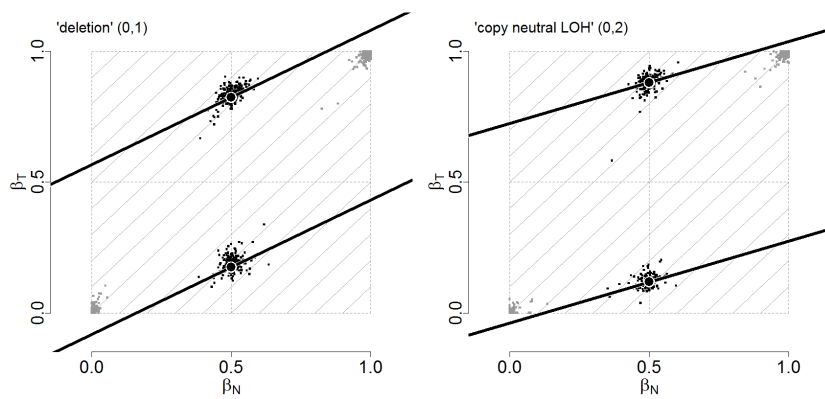

Figure 25: raw,NGC for region TCGA-23-1027:Chr10@106.5-113.5,cp=110+/-0.5,s=2/3.

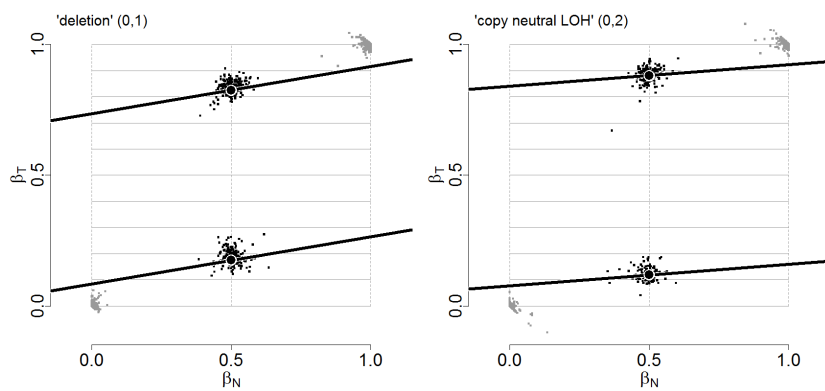

Figure 26: TBN,NGC,NGC for region TCGA-23-1027:Chr10@106.5-113.5,cp=110+/-0.5,s=2/3.

## 6.5 Allele-specific copy number estimates

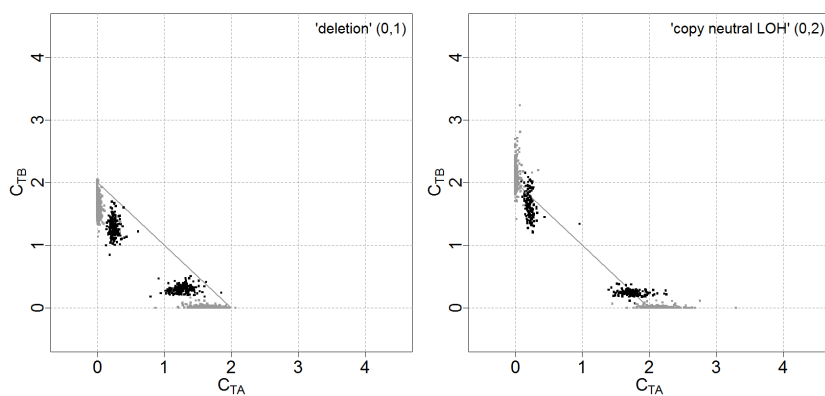

Figure 27: raw,NGC for region TCGA-23-1027:Chr10@106.5-113.5,cp=110+/-0.5,s=2/3.

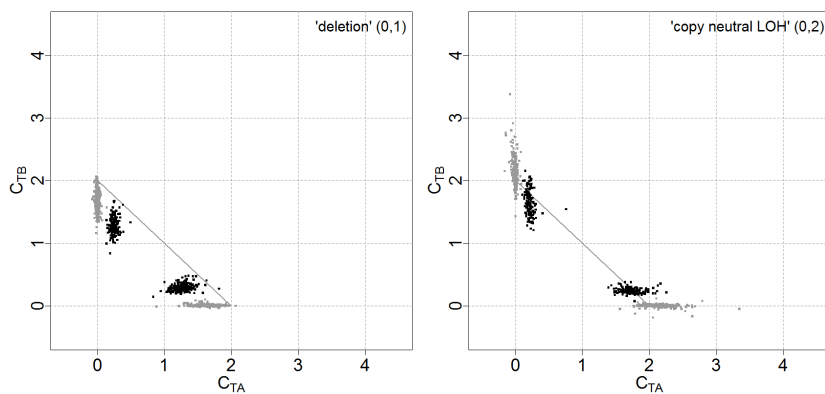

Figure 28: TBN,NGC,NGC for region TCGA-23-1027:Chr10@106.5-113.5,cp=110+/-0.5,s=2/3.

## 7 Region: TCGA-23-1027:Chr2@55-75.0,cp=65.0+/-0.5,s=0/1

### 7.1 Decrease in Heterozygosity (DH) and total copy-number tracks

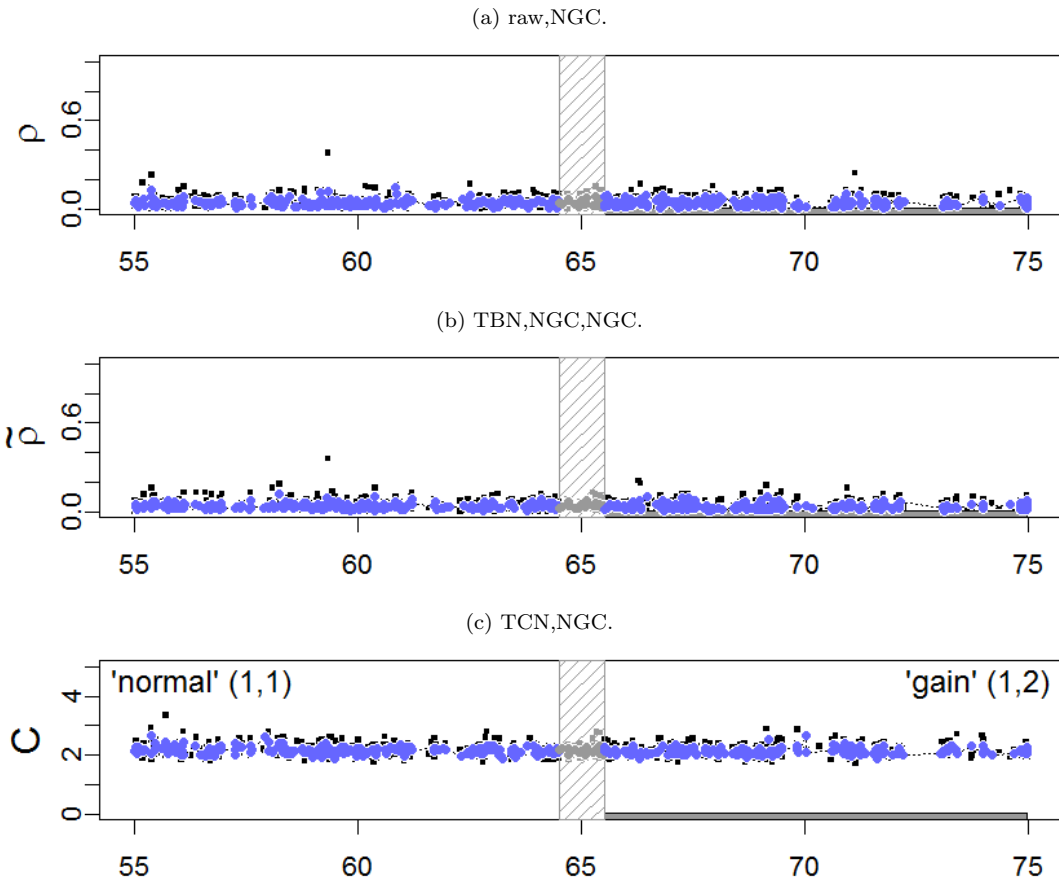

Figure 29: Decrease in Heterozygosity (DH) and total copy numbers for region TCGA-23-1027:Chr2@55-75.0,cp=65.0+/-0.5,s=0/1. Only heterozygous SNPs are plotted. There are 868 loci of state 'normal' (1,1) ("negatives") and 868 loci of state 'gain' (1,2) ("positives"), where the latter are highlighted with a solid bar beneath. In total 82 loci within the safety margin were excluded.

## 7.2 Allele B fraction density plots

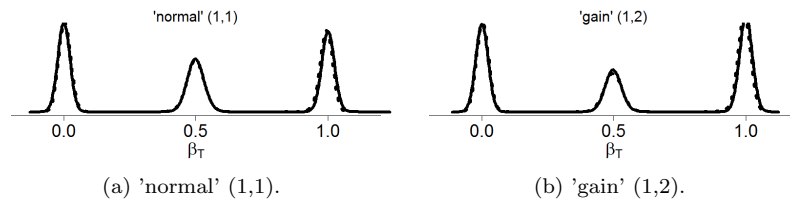

Figure 30: Density of raw (dashed lines) and TumorBoost-normalized (solid lines) allele B fractions for region TCGA-23-1027:Chr2@55-75.0,cp=65.0+/-0.5,s=0/1.

## 7.3 ROC curves

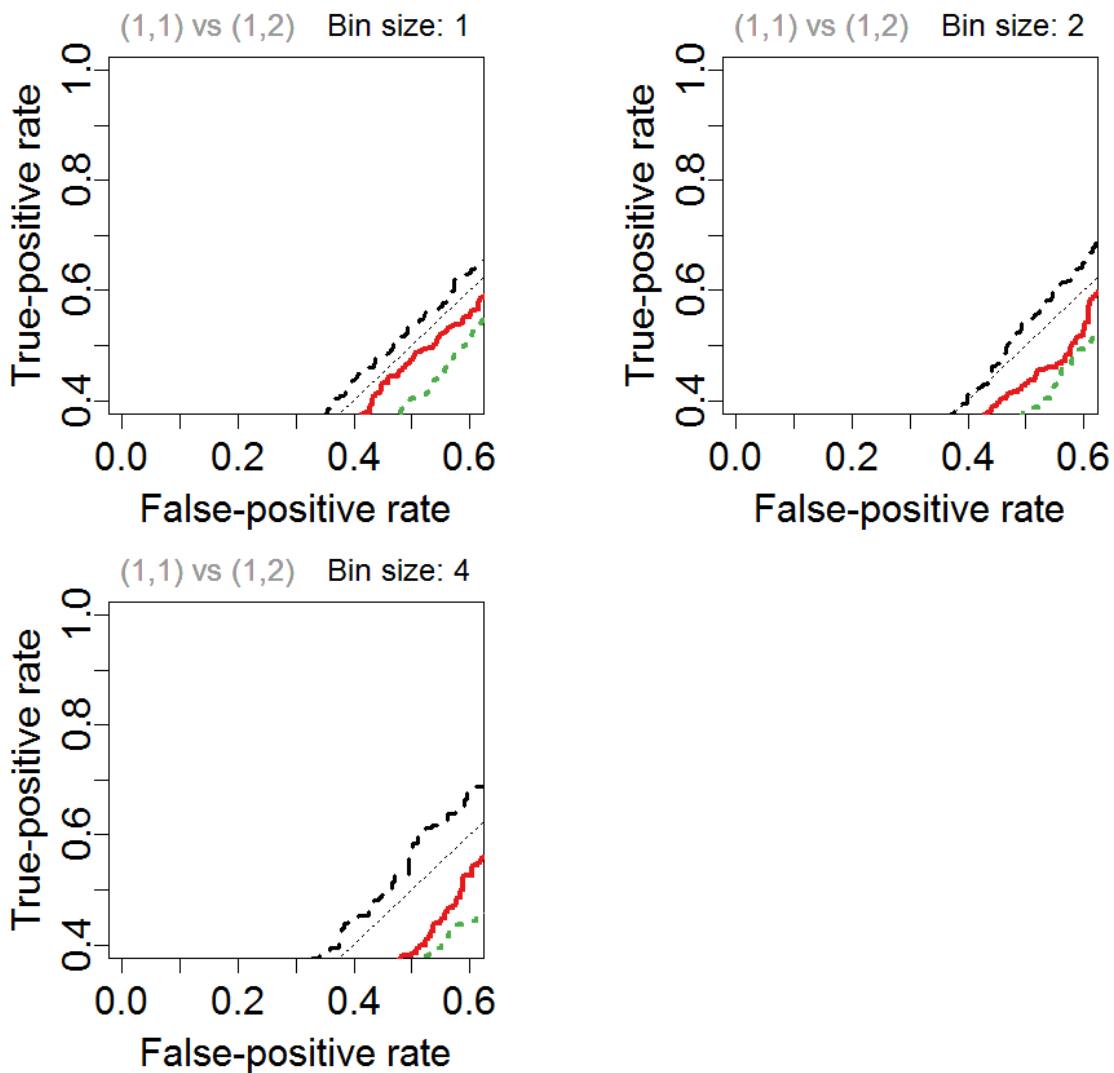

Figure 31: ROC curves for each preprocessing method at the full resolution as well as 2 different amounts of smoothing (using the `mean()` function) for region TCGA-23-1027:Chr2@55-75.0,cp=65.0+/-0.5,s=0/1. Legend: raw,NGC (dashed; #000000), TBN,NGC,NGC (solid; #E41A1C) and TCN,NGC (dotted; #4DAF4A).

## 7.4 $(\beta_N, \beta_T)$ plots

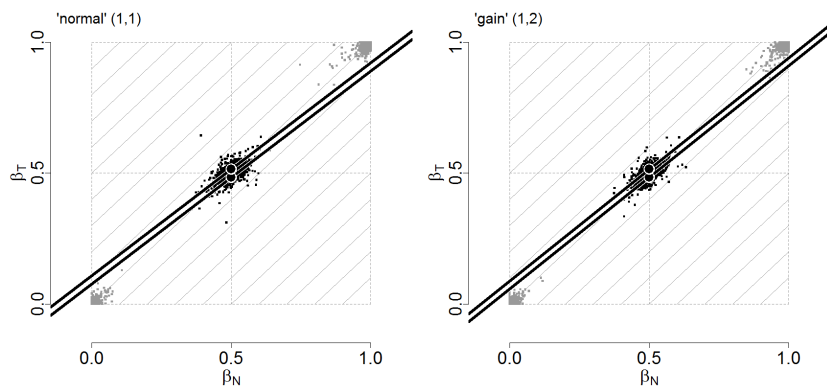

Figure 32: raw,NGC for region TCGA-23-1027:Chr2@55-75.0,cp=65.0+/-0.5,s=0/1.

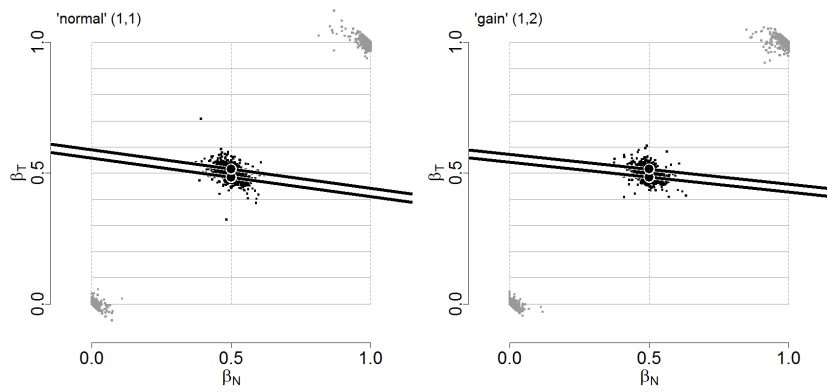

Figure 33: TBN,NGC,NGC for region TCGA-23-1027:Chr2@55-75.0,cp=65.0+/-0.5,s=0/1.

## 7.5 Allele-specific copy number estimates

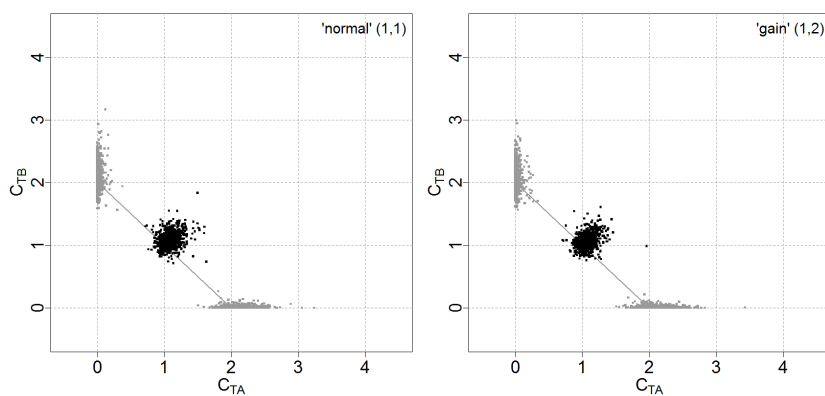

Figure 34: raw,NGC for region TCGA-23-1027:Chr2@55-75.0,cp=65.0+/-0.5,s=0/1.

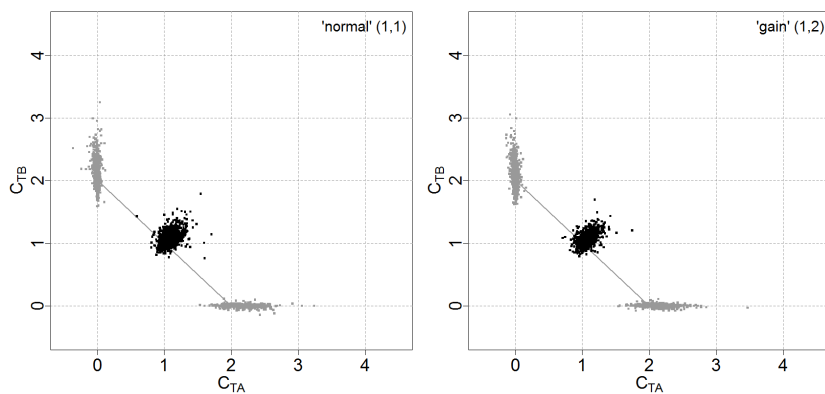

Figure 35: TBN,NGC,NGC for region TCGA-23-1027:Chr2@55-75.0,cp=65.0+/-0.5,s=0/1.

## 8 Bootstrap estimates of test statistics for all regions

|             | 0/1          | 1/3          | 0/2           | 2/3          | 0/1         |
|-------------|--------------|--------------|---------------|--------------|-------------|
| raw,NGC     | 41.428±3.084 | 90.583±6.583 | 111.277±6.927 | 21.343±1.421 | 1.029±0.678 |
| TBN,NGC,NGC | 47.045±3.772 | 95.000±8.958 | 117.973±7.758 | 22.082±1.259 | 1.089±0.766 |
| TCN,NGC     | 16.040±1.121 | 21.895±1.293 | 39.165±1.817  | 23.926±1.275 | 1.810±1.000 |

Table 2: Student test statistics of the null hypothesis of equal mean before and after each PCN change point (heterozygous SNPs): raw or TumorBoost-normalized DH, and total copy number (last line). Mean  $\pm$  standard deviation across 100 samplings of 225 points (for each PCN state) from the original data set. The larger value, the more different the true means are.



## References

Peiffer, D. A., Le, J. M., Steemers, F. J., Chang, W., Jenniges, T., Garcia, F., Haden, K., Li, J., Shaw, C. A., Belmont, J., Cheung, S. W., Shen, R. M., Barker, D. L., and Gunderson, K. L. (2006). High-resolution genomic profiling of chromosomal aberrations using Infinium whole-genome genotyping. *Genome Res.*, **16**(9), 1136–1148.

## A Data files

### A.1 Total copy numbers

```
$TCGA,OV,BeadStudio,BAF`  
AromaUnitTotalCnBinarySet:  
Name: TCGA  
Tags: OV,BeadStudio,BAF  
Full name: TCGA,OV,BeadStudio,BAF  
Number of files: 1  
Names: TCGA-23-1027  
Path (to the first file): rawCnData/TCGA,OV,BeadStudio,BAF/Human1M-Duo  
Total file size: 4.58 MB  
RAM: 0.00MB
```

### A.2 Allele B fractions

```
$raw  
AromaUnitFracBCnBinarySet:  
Name: TCGA  
Tags: OV,BeadStudio,BAF  
Full name: TCGA,OV,BeadStudio,BAF  
Number of files: 1  
Names: TCGA-23-1027  
Path (to the first file): totalAndFracBData/TCGA,OV,BeadStudio,BAF/Human1M-Duo  
Total file size: 4.58 MB  
RAM: 0.00MB
```

```
$TBN,NGC`  
AromaUnitFracBCnBinarySet:  
Name: TCGA  
Tags: OV,BeadStudio,BAF,TBN,NGC  
Full name: TCGA,OV,BeadStudio,BAF,TBN,NGC  
Number of files: 1  
Names: TCGA-23-1027  
Path (to the first file): totalAndFracBData/TCGA,OV,BeadStudio,BAF,TBN,NGC/Human1M-Duo  
Total file size: 4.58 MB  
RAM: 0.00MB
```

### A.3 Genotype calls

```
$NGC  
AromaUnitGenotypeCallSet:  
Name: TCGA  
Tags: OV,BeadStudio,BAF,NGC  
Full name: TCGA,OV,BeadStudio,BAF,NGC  
Number of files: 1  
Names: TCGA-23-1027  
Path (to the first file): callData/TCGA,OV,BeadStudio,BAF,NGC/Human1M-Duo  
Total file size: 2.29 MB  
RAM: 0.00MB
```

### A.4 Genotype confidence scores

```
$NGC  
AromaUnitSignalBinarySet:
```

Name: TCGA  
Tags: OV,BeadStudio,BAF,NGC  
Full name: TCGA,OV,BeadStudio,BAF,NGC  
Number of files: 1  
Names: TCGA-23-1027  
Path (to the first file): callData/TCGA,OV,BeadStudio,BAF,NGC/Human1M-Duo  
Total file size: 4.57 MB  
RAM: 0.00MB

## B Session information

This report was automatically generated using the R.rsp package.

- R version 2.10.0 Patched (2009-11-21 r50532), i386-pc-mingw32
- Locale: LC\_COLLATE=English\_United States.1252, LC\_CTYPE=English\_United States.1252, LC\_MONETARY=English\_United States.1252, LC\_NUMERIC=C, LC\_TIME=English\_United States.1252
- Base packages: base, datasets, graphics, grDevices, methods, stats, utils
- Other packages: aroma.cn.eval 0.1.1, aroma.core 1.3.5, aroma.light 1.15.1, digest 0.4.1, MASS 7.3-3, matrixStats 0.1.8, R.cache 0.2.0, R.filesets 0.6.5, R.menu 0.0.5, R.methodsS3 1.1.0, R.oo 1.6.6, R.rsp 0.3.6, R.utils 1.2.4, RColorBrewer 1.0-2, xtable 1.5-5
- Loaded via a namespace (and not attached): affxparser 1.18.0
