# Supplementary material for: TumorBoost: Normalization of allele-specific tumor copy numbers from a single pair of tumor-normal genotyping microarrays
Source: Springer Nature journal article supplement (doi:10.1186/1471-2105-11-245), 2010-05-12
Supplement: 12859_2009_3702_MOESM13_ESM.pdf [file 12859_2009_3702_MOESM13_ESM.pdf]

(a) Total copy numbers

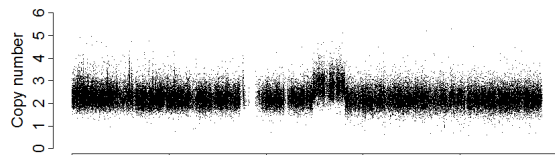

(b) Raw allele B fractions of the normal

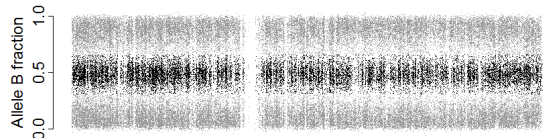

(c) Raw allele B fractions of the tumor

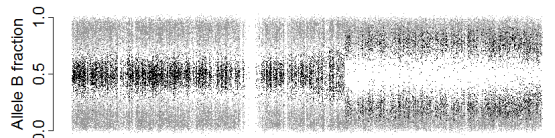

(d) Normalized allele B fractions of the tumor

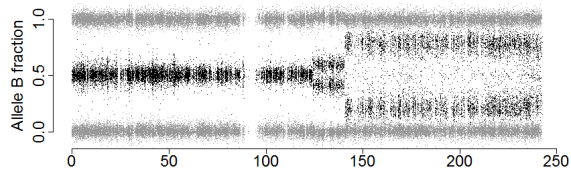

Chromosome 2 (in Mb)

(e) Total copy numbers

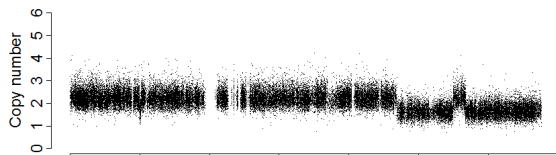

(f) Raw allele B fractions of the normal

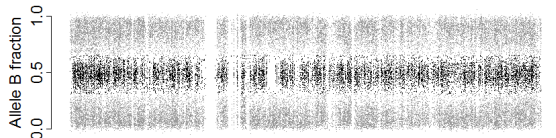

(g) Raw allele B fractions of the tumor

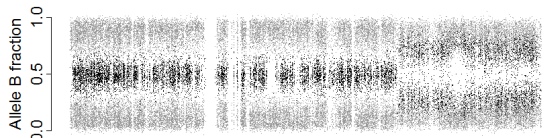

(h) Normalized allele B fractions of the tumor

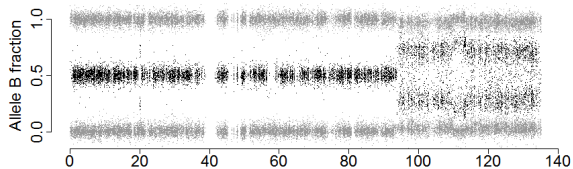

Chromosome 10 (in Mb)
