# Supplementary material for: TumorBoost: Normalization of allele-specific tumor copy numbers from a single pair of tumor-normal genotyping microarrays
Source: Springer Nature journal article supplement (doi:10.1186/1471-2105-11-245), 2010-05-12

Chromosome 2

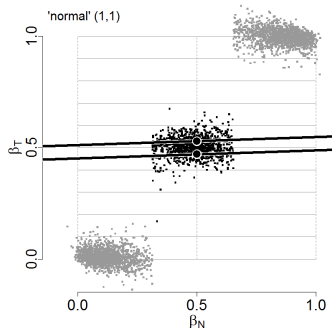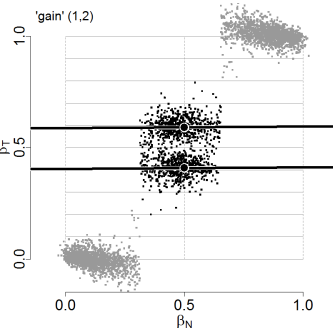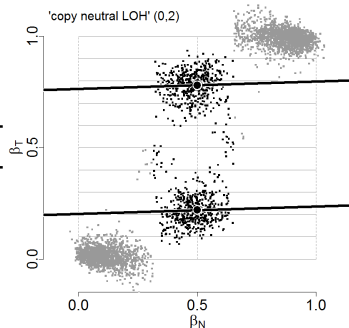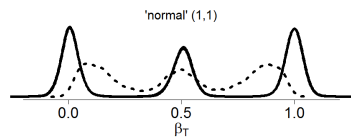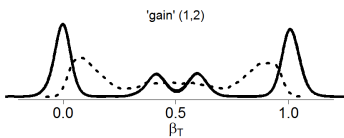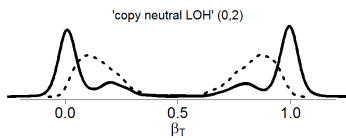

Chromosome 10

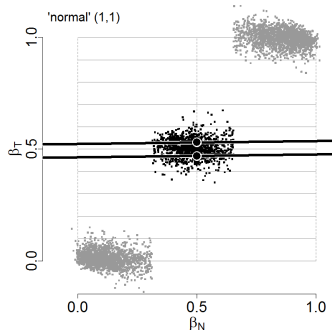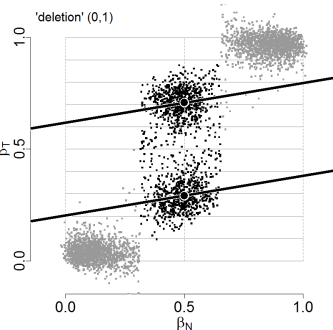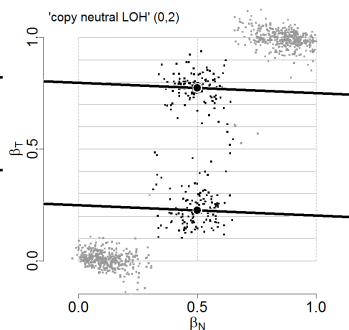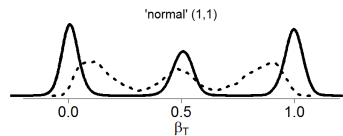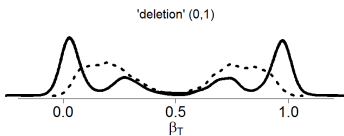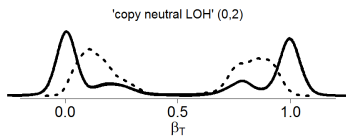

Supplement: 12859_2009_3702_MOESM15_ESM.pdf [file 12859_2009_3702_MOESM15_ESM.pdf]
