# Supplementary material for: TumorBoost: Normalization of allele-specific tumor copy numbers from a single pair of tumor-normal genotyping microarrays
Source: Springer Nature journal article supplement (doi:10.1186/1471-2105-11-245), 2010-05-12

(a) N/D: normal (1,1) / deletion (0,1)

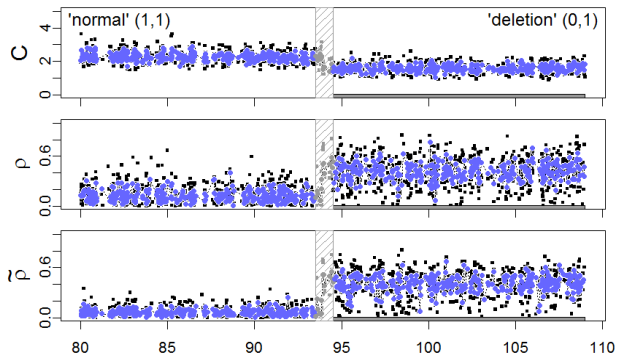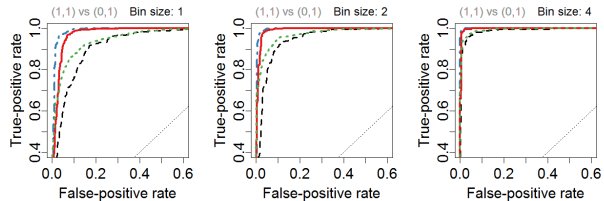

(b) D/L: deletion (0,1) / copy-neutral LOH (0,2)

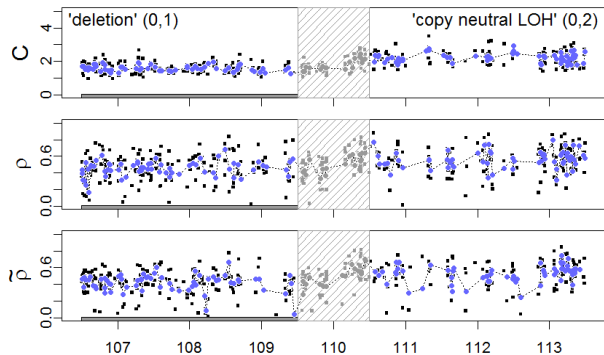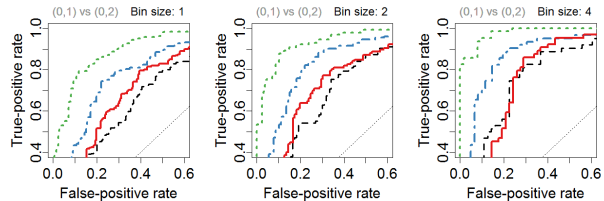

Supplement: 12859_2009_3702_MOESM18_ESM.pdf [file 12859_2009_3702_MOESM18_ESM.pdf]
